# Supplementary material
Source: PubMed Central journal article supplement (PMC2481406)
Supplement: NIHMS54323-supplement-01.pdf [file NIHMS54323-supplement-01.pdf]

## Supplemental Material

### Table S1

| Restriction Enzyme | Dimer digestion rate (fraction cut per min.) | ±       | Monomer digestion rate (fraction cut per min.) | ±       | Kequ | ±    | Ave Kequ | ±    |
|--------------------|----------------------------------------------|---------|------------------------------------------------|---------|------|------|----------|------|
| Pst I              | 0.02                                         | 0.001   | 0.059                                          | 0.009   | 0.3  | 0.1  |          |      |
| Pst I              | 0.0069                                       | 0.0008  | 0.031                                          | 0.006   | 0.2  | 0.1  | 0.3      | 0.08 |
| Hind III           | 0.0019                                       | 0.0002  | 0.0038                                         | 0.0001  | 0.5  | 0.1  |          |      |
| Hind III           | 0.0010                                       | 0.0004  | 0.009                                          | 0.001   | 0.1  | 0.05 |          |      |
| Hind III           | 0.0006                                       | 0.0002  | 0.0088                                         | 0.0007  | 0.07 | 0.0  | 0.2      | 0.2  |
| HaeIII             | 0.0046                                       | 0.0001  | 0.0009                                         | 0.0001  | 5.1  | 0.6  |          |      |
| HaeIII             | 0.0083                                       | 0.0004  | 0.0007                                         | 0.0002  | 12   | 3    |          |      |
| HaeIII             | 0.0062                                       | 0.0005  | 0.0009                                         | 0.0002  | 6.7  | 1.6  | 8.0      | 3.5  |
| Bam HI             | 0.0002                                       | 0.0001  | 0.0001                                         | 0.00002 | 2.0  | 1.   |          |      |
| Bam HI             | 0.00005                                      | 0.00002 | 0.0001                                         | 0.00004 | 0.5  | 0.3  |          |      |
| Bam HI             | 0.00011                                      | 0.00003 | 0.00007                                        | 0.00003 | 1.6  | 0.8  | 1.4      | 0.8  |
| Dra I              | 0.00007                                      | 0.00003 | 0.00010                                        | 0.00004 | 0.7  | 0.4  |          |      |
| Dra I              | 0.00008                                      | 0.00002 | 0.00016                                        | 0.00006 | 0.5  | 0.2  | 0.6      | 0.1  |
| Sty I              | 0.00014                                      | 0.00005 | 0.00006                                        | 0.00003 | 2.3  | 1.4  |          |      |
| Sty I              | 0.00008                                      | 0.00002 | 0.00010                                        | 0.00003 | 0.8  | 0.3  | 2        | 1    |
| Pml I              | 0.0004                                       | 0.0001  | 0.0007                                         | 0.0002  | 0.6  | 0.2  |          |      |
| Pml I              | 0.00046                                      | 0.00007 | 0.0010                                         | 0.0002  | 0.5  | 0.1  | 0.5      | 0.08 |

### Table S2

| Restriction Enzyme | 17mer digestion rate (fraction cut per min.) | ±      | Monomer digestion rate (fraction cut per min.) | ±       | Kequ  | ±   | Ave Kequ | ±    |
|--------------------|----------------------------------------------|--------|------------------------------------------------|---------|-------|-----|----------|------|
| PstI               | 0.02200                                      | 0.0060 | 0.08100                                        | 0.01000 | 0.27  | 0.1 |          |      |
| PstI               | 0.01200                                      | 0.0020 | 0.03600                                        | 0.00300 | 0.33  | 0.1 | 0.3      | 0.04 |
| Hind III           | 0.00170                                      | 0.0004 | 0.00580                                        | 0.00050 | 0.29  | 0.1 |          |      |
| Hind III           | 0.00160                                      | 0.0005 | 0.00620                                        | 0.00050 | 0.26  | 0.1 | 0.3      | 0.02 |
| Hae III            | 0.00340                                      | 0.0003 | 0.00068                                        | 0.00020 | 5.0   | 1.5 |          |      |
| Hae III            | 0.00240                                      | 0.0007 | 0.00084                                        | 0.00020 | 2.9   | 1.1 |          |      |
| Hae III            | 0.00180                                      | 0.0003 | 0.00120                                        | 0.00030 | 1.5   | 0.5 | 3.1      | 1.8  |
| Bam HI             | 0.00230                                      | 0.0005 | 0.00063                                        | 0.00010 | 3.7   | 1.0 |          |      |
| Bam HI             | 0.00240                                      | 0.0004 | 0.00100                                        | 0.00030 | 2.4   | 0.8 | 3.0      | 0.9  |
| Dra I              | 0.00054                                      | 0.0003 | 0.00013                                        | 0.00004 | 4.2   | 2.6 |          |      |
| Dra I              | 0.00100                                      | 0.0005 | 0.00011                                        | 0.00005 | 9.1   | 6.1 | 6.6      | 3.5  |
| Sty I              | 0.00100                                      | 0.0006 | 0.00010                                        | 0.00005 | 10.00 | 8   |          |      |
| Sty I              | 0.00220                                      | 0.0003 | 0.00053                                        | 0.00010 | 4     | 1   |          |      |
| Sty I              | 0.00110                                      | 0.0005 | 0.00012                                        | 0.00010 | 9     | 8   | 7.8      | 3.2  |
| Pml I              | 0.00240                                      | 0.0004 | 0.00290                                        | 0.00070 | 0.8   | 0.2 |          |      |
| Pml I              | 0.00070                                      | 0.0003 | 0.00160                                        | 0.00030 | 0.4   | 0.2 | 0.6      | 0.3  |

**Table S3**

| Restriction Enzyme | Dimer digestion rate (fraction cut per min.) | ±      | DNA digestion rate (fraction cut per min.) | ±     | Kequ | ±     | Aver Kequ | ±    |
|--------------------|----------------------------------------------|--------|--------------------------------------------|-------|------|-------|-----------|------|
| Rsr II             | 0.083                                        | 0.01   | 0.021                                      | 0.001 | 4.0  | 0.5   |           |      |
| Rsr II             | 0.15                                         | 0.02   | 0.051                                      | 0.004 | 2.9  | 0.5   | 3.5       | 0.7  |
| Sac I              | 0.038                                        | 0.001  | 0.083                                      | 0.01  | 0.46 | 0.06  |           |      |
| Sac I              | 0.045                                        | 0.002  | 0.058                                      | 0.001 | 0.78 | 0.04  | 0.6       | 0.2  |
| Nsi I              | 0.0077                                       | 0.0002 | 0.18                                       | 0.01  | 0.04 | 0.003 |           |      |
| Nsi I              | 0.016                                        | 0.001  | 0.20                                       | 0.01  | 0.08 | 0.006 | 0.06      | 0.03 |

**Table S4**

| Restriction Enzyme | 17mer digestion rate (fraction cut per min.) | ±      | DNA digestion rate (fraction cut per min.) | ±      | Kequ  | ±     | Ave Kequ | ±     |
|--------------------|----------------------------------------------|--------|--------------------------------------------|--------|-------|-------|----------|-------|
| Rsr II             | 0.019                                        | 0.0007 | 0.0034                                     | 0.0002 | 5.6   | 0.4   |          |       |
| Rsr II             | 0.029                                        | 0.003  | 0.066                                      | 0.007  | 0.43  | 0.07  |          |       |
| Rsr II             | 0.0075                                       | 0.0005 | 0.0039                                     | 0.0002 | 1.9   | 0.2   |          |       |
| Rsr II             | 0.09                                         | 0.02   | 0.012                                      | 0.0003 | 7.5   | 2     |          |       |
| Rsr II             | 0.044                                        | 0.003  | 0.009                                      | 0.001  | 4.9   | 0.6   | 4        | 3     |
| Sac I              | 0.001                                        | 0.0001 | 0.03                                       | 0.005  | 0.033 | 0.006 |          |       |
| Sac I              | 0.005                                        | 0.002  | 0.44                                       | 0.01   | 0.011 | 0.005 |          |       |
| Sac I              | 0.01                                         | 0.001  | 0.6                                        | 0.02   | 0.017 | 0.002 | 0.020    | 0.01  |
| Nsi I              | 0.023                                        | 0.002  | 0.94                                       | 0.05   | 0.024 | 0.002 |          |       |
| Nsi I              | 0.015                                        | 0.001  | 0.67                                       | 0.04   | 0.022 | 0.002 |          |       |
| Nsi I              | 0.015                                        | 0.001  | 0.49                                       | 0.01   | 0.031 | 0.002 | 0.026    | 0.004 |
